# Supplementary material
Source: Royal Society of Chemistry journal article supplement (https://www.rsc.org/suppdata/cc/1999/2253/906206h.doc)

**Supplementary data**

**An acentric arrangement of *p*-nitroaniline molecules between the layers of kaolinite**

**Kazuyuki Kuroda, **ab* Kouichi Hiraguri,*a* Yoshihiko Komori,*ab* Yoshiyuki Sugahara,*a* Haruyuki Mouri*c* and Yoshiaki Uesu*c***

*a Department of Applied Chemistry, Waseda University, Ohkubo-3, Shinjuku-ku, Tokyo 169-8555, Japan. E-mail: kuroda@mn.waseda.ac.jp*

*b Kagami Memorial Laboratory for Materials Science and Technology, Waseda University, Nishiwaseda-2, Shinjuku-ku, 165-0051, Tokyo, Japan*

*c Department of Physics, Waseda University, Ohkubo-3, Shinjuku-ku, Tokyo 169-8555, Japan*


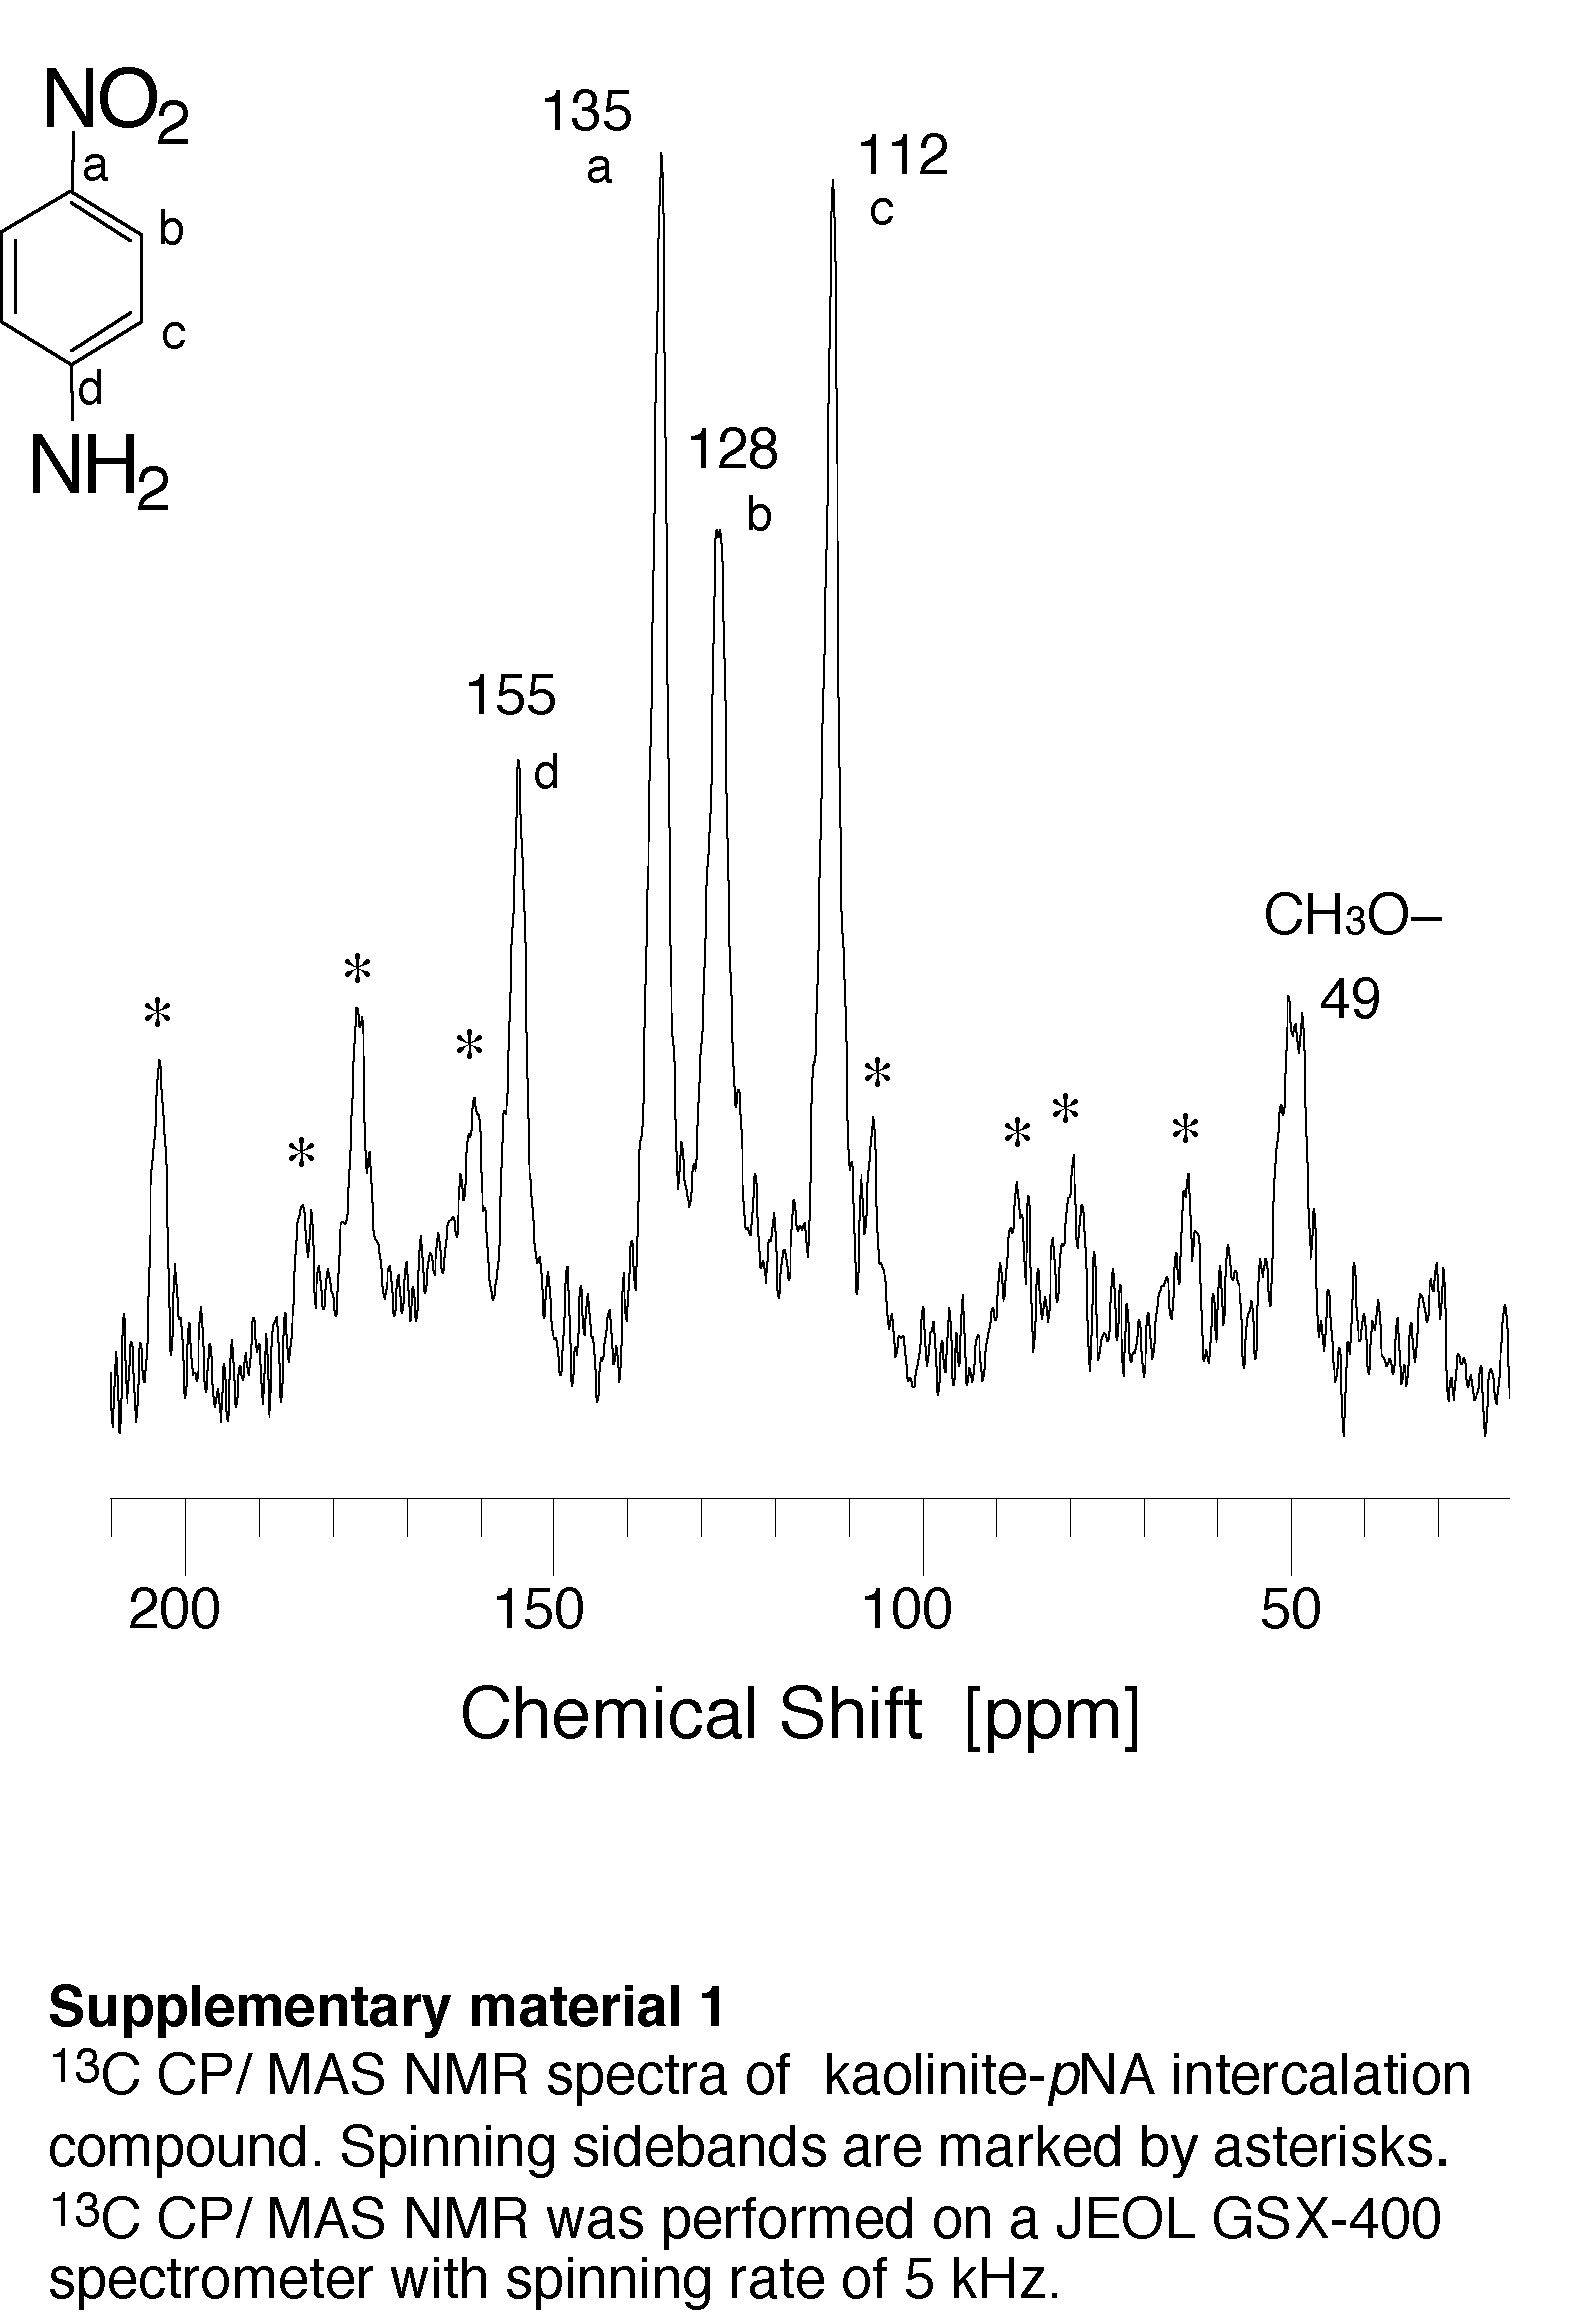


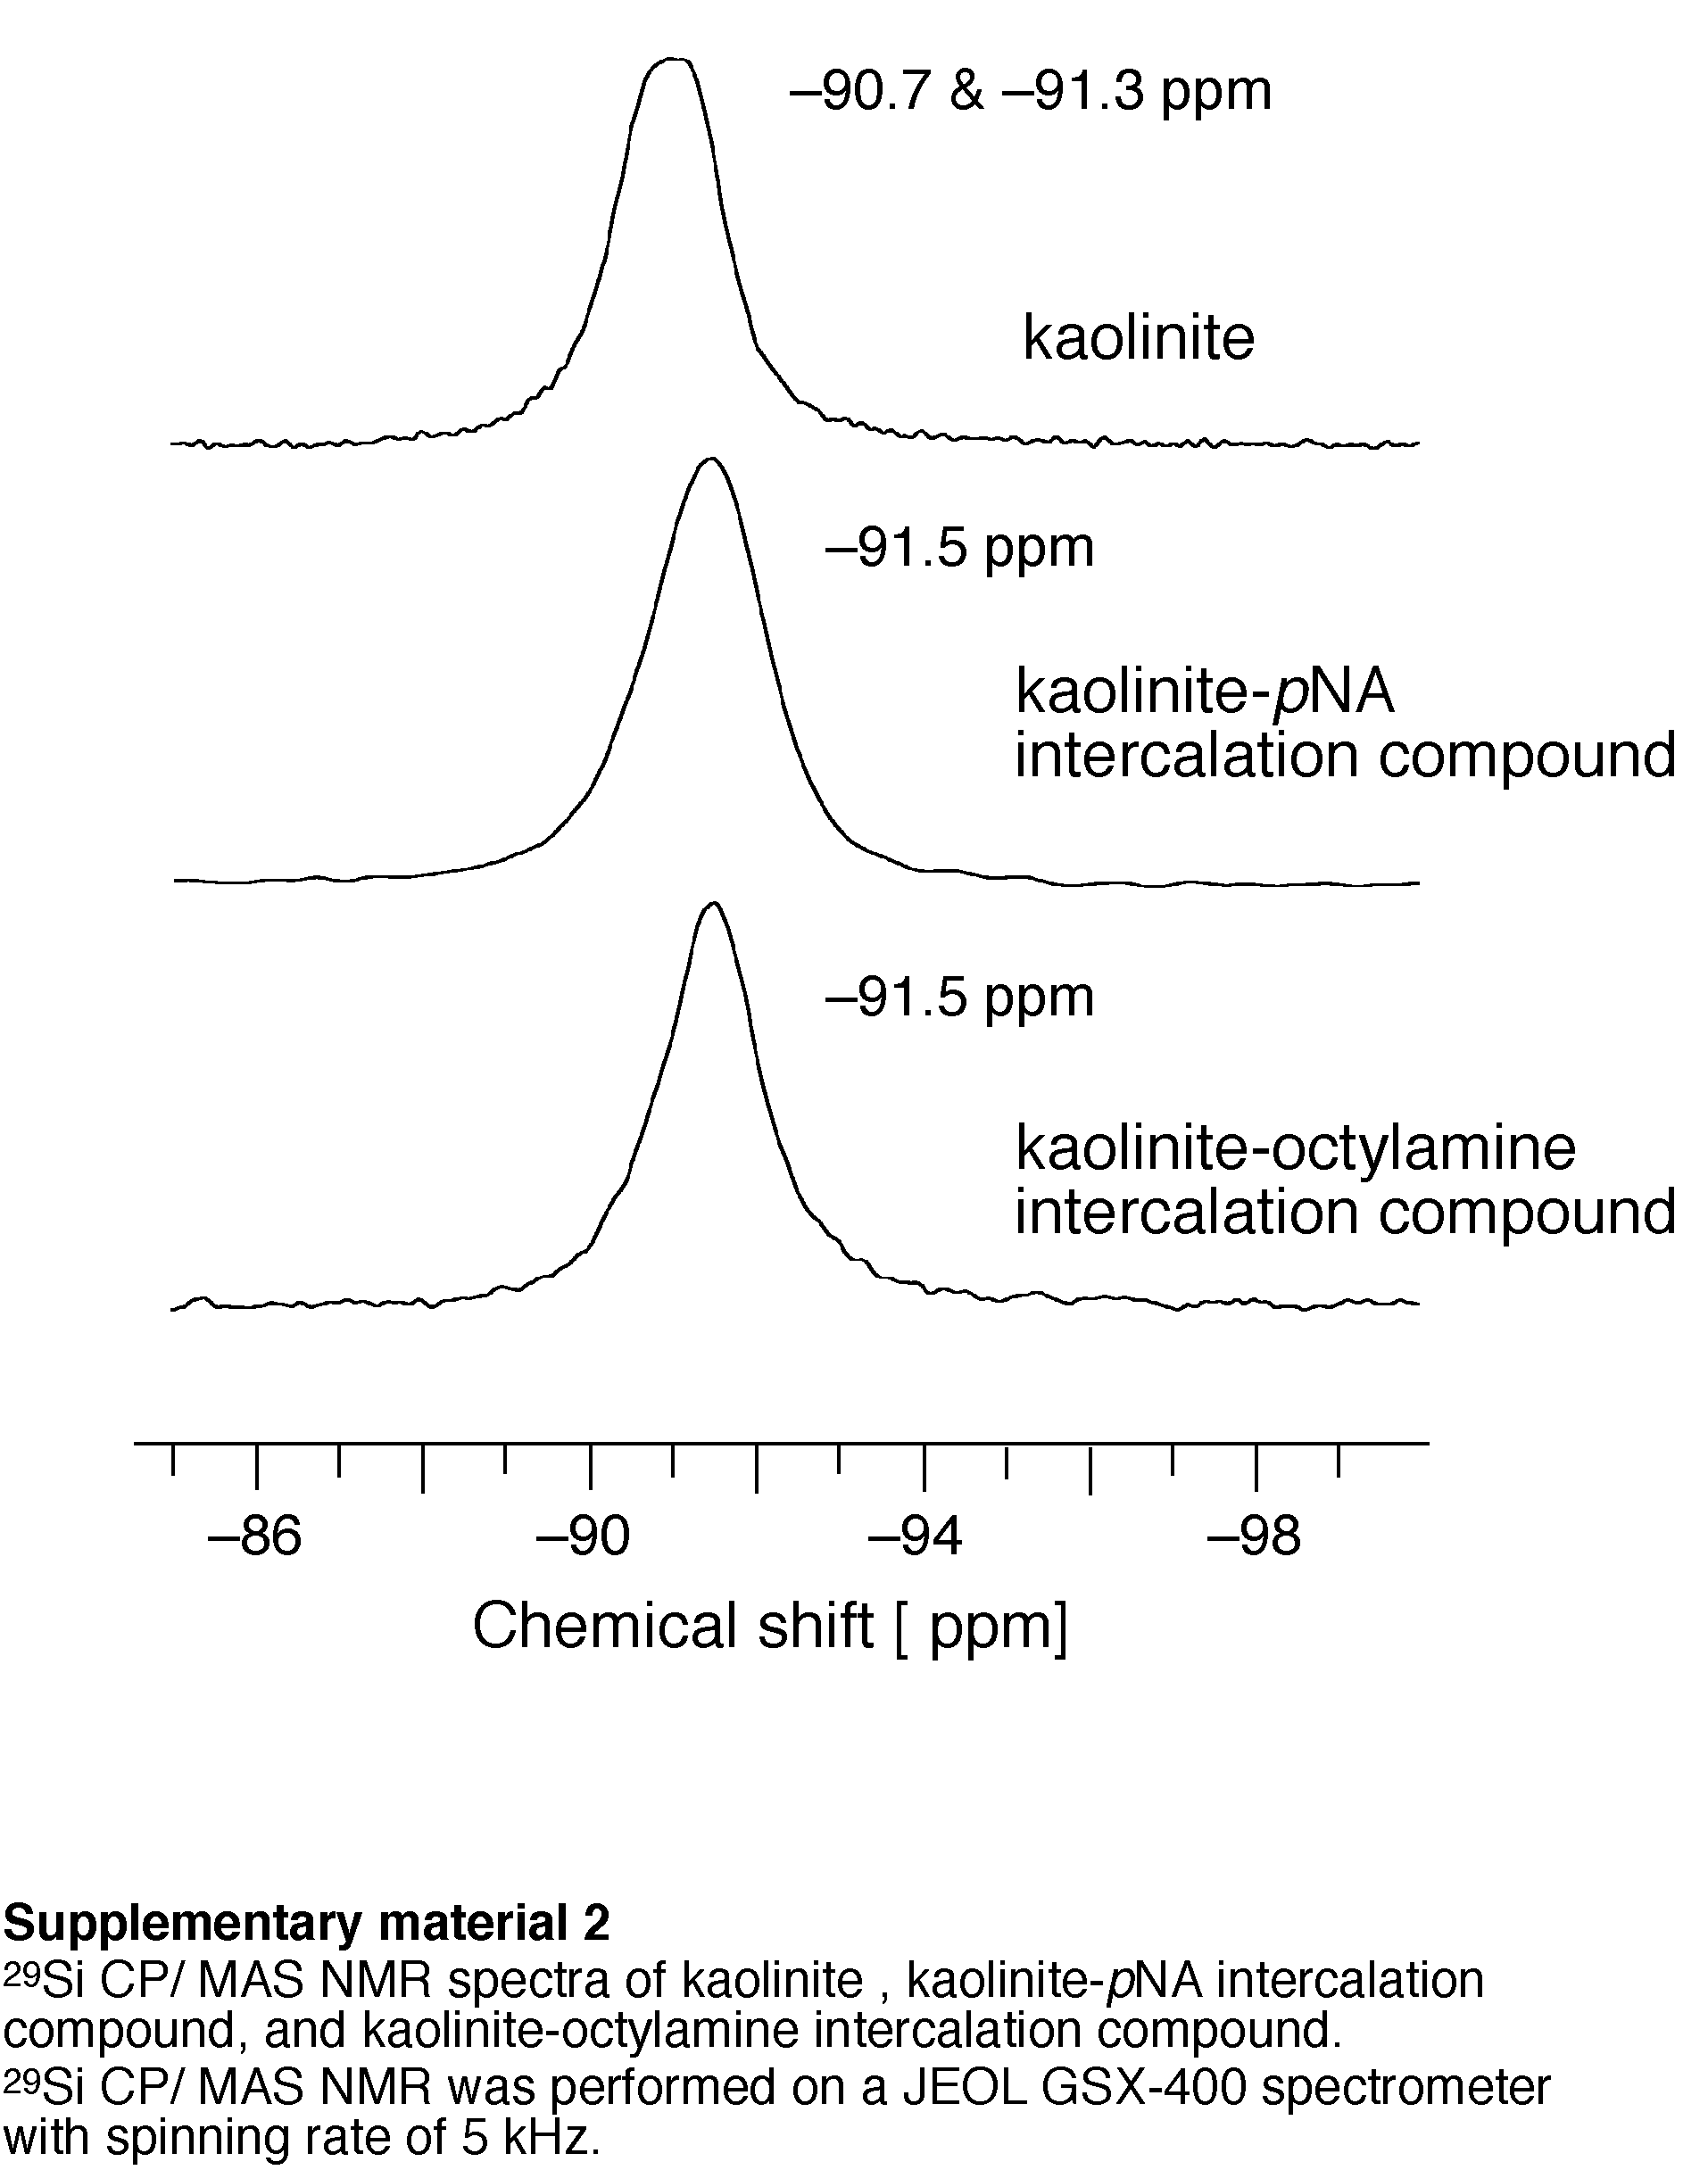


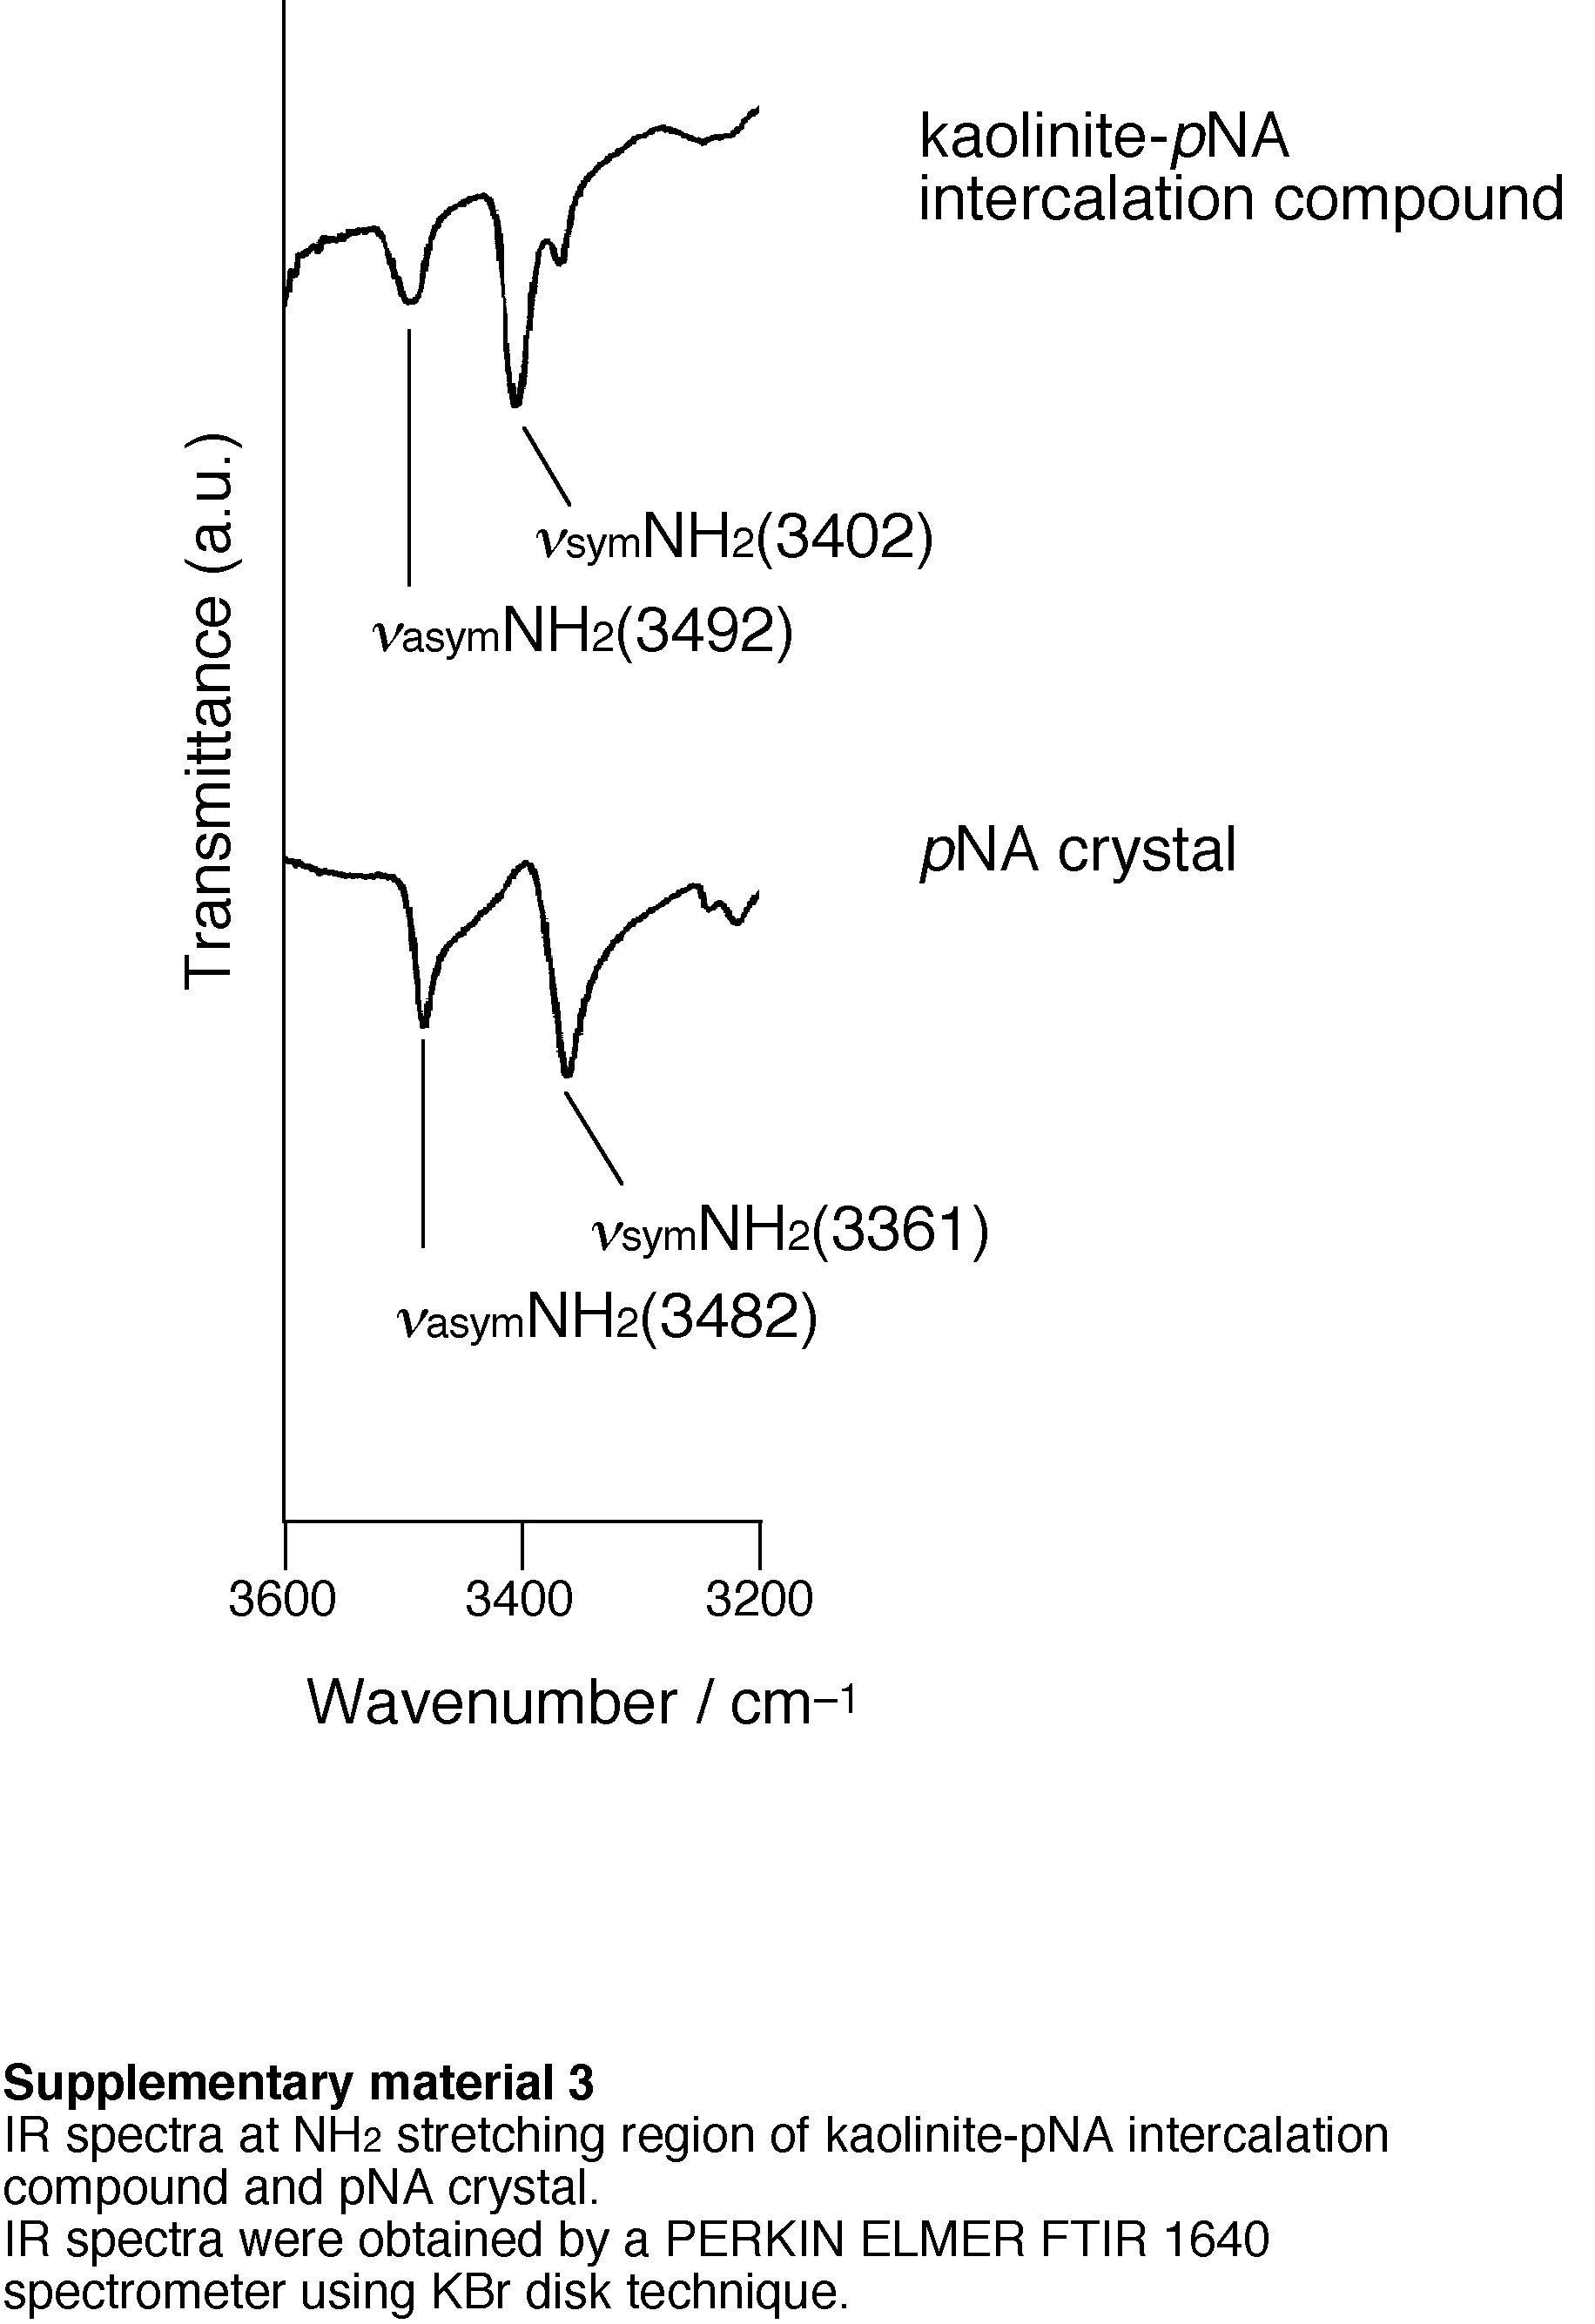

Supplement: Supplementary file 1 [file 906206h.doc]
